# Supplementary material for: NaZr2(PO4)3 – a cubic langbeinite-type sodium-ion solid conductor
Source: Royal Society of Chemistry journal article supplement (doi:10.1039/d4dt02288b), 2024-01-01
Supplement: d4dt02288b1.pdf [file d4dt02288b1.pdf]

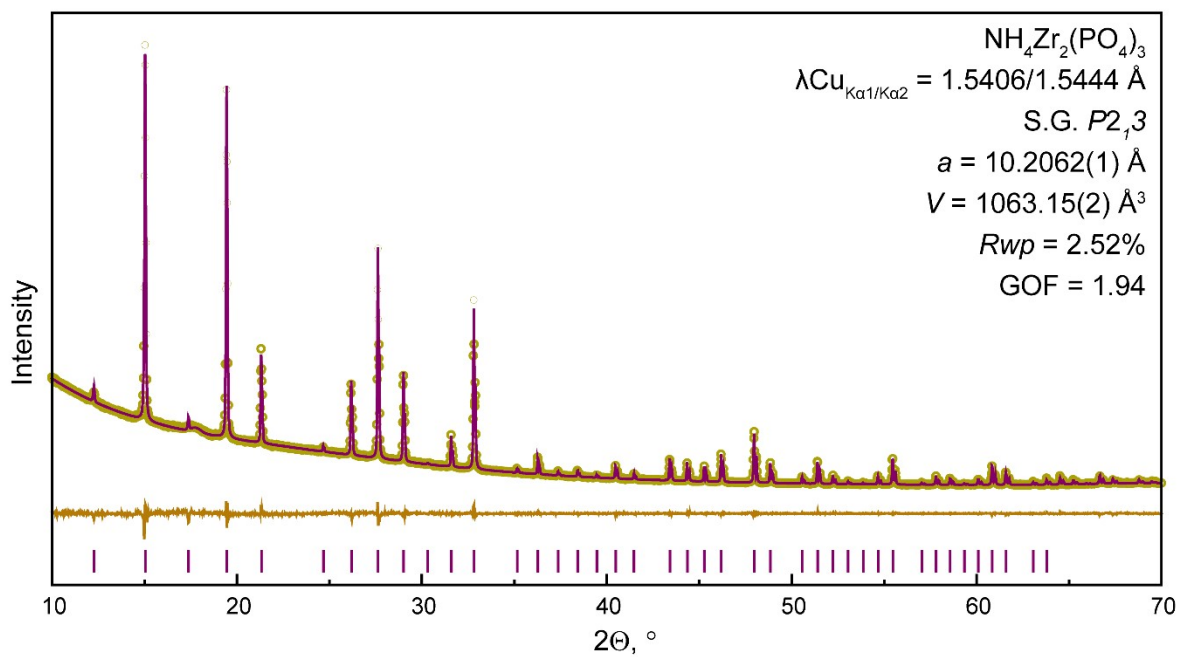

Figure 1. The Rietveld refinement of the PXRD langbeinite-structured  $\text{NH}_4\text{Zr}_2(\text{PO}_4)_3$ .

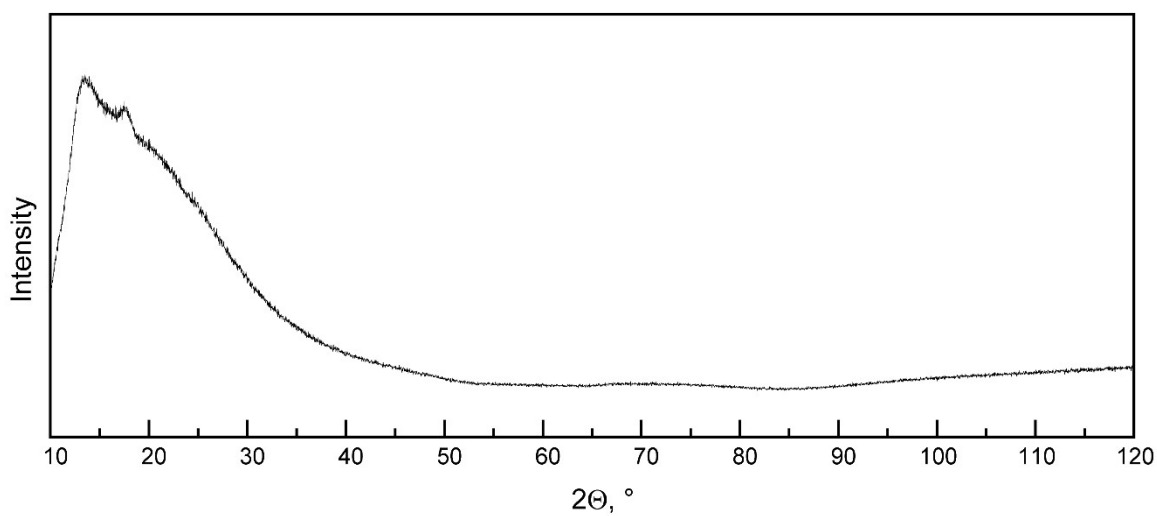

Figure 2. XRD pattern of an empty inert sample holder.

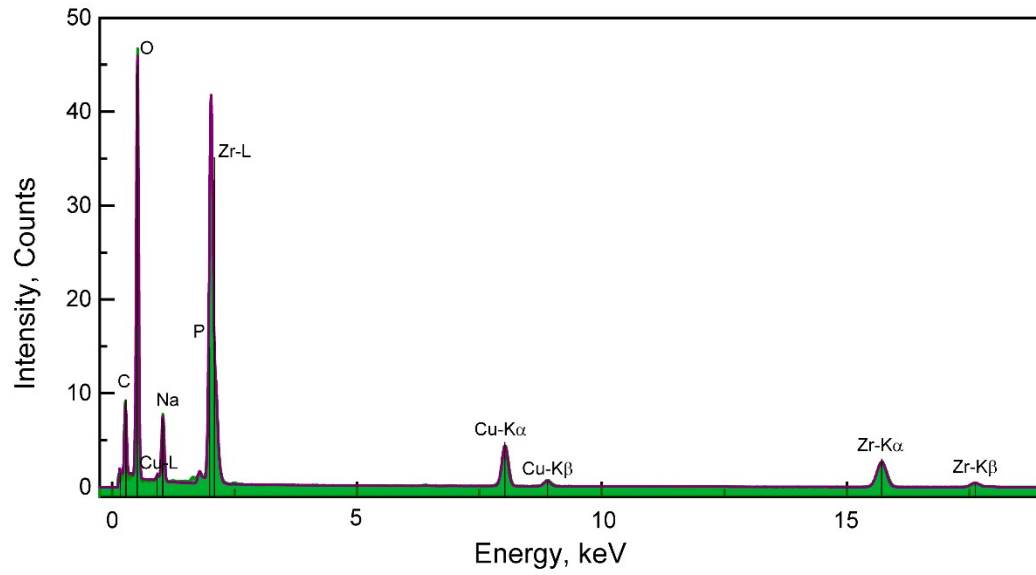

Figure 3. STEM-EDX spectra of NaZr<sub>2</sub>(PO<sub>4</sub>)<sub>3</sub>.

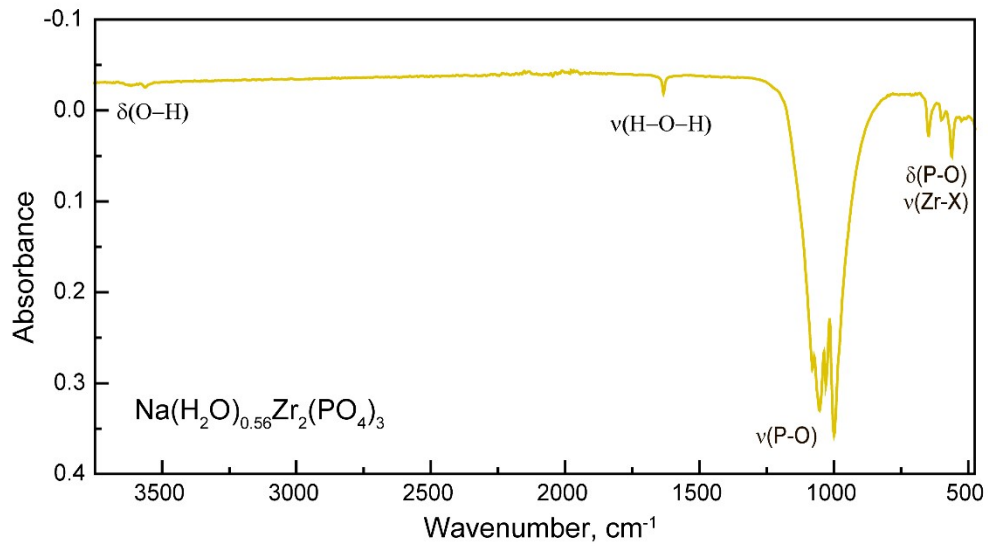

Figure 4. FTIR spectra of the Na(H<sub>2</sub>O)<sub>0.56</sub>Zr<sub>2</sub>(PO<sub>4</sub>)<sub>3</sub>-langbeinite stored under air atmosphere.

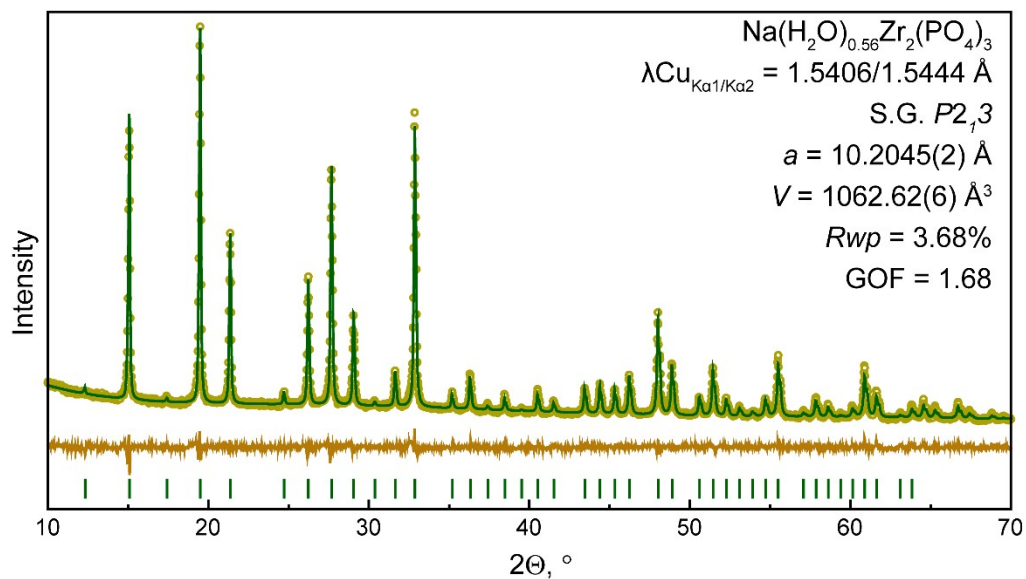

Figure 5. The Rietveld refinement of PXRD for langbeinite-structured  $\text{Na}(\text{H}_2\text{O})_{0.56}\text{Zr}_2(\text{PO}_4)_3$

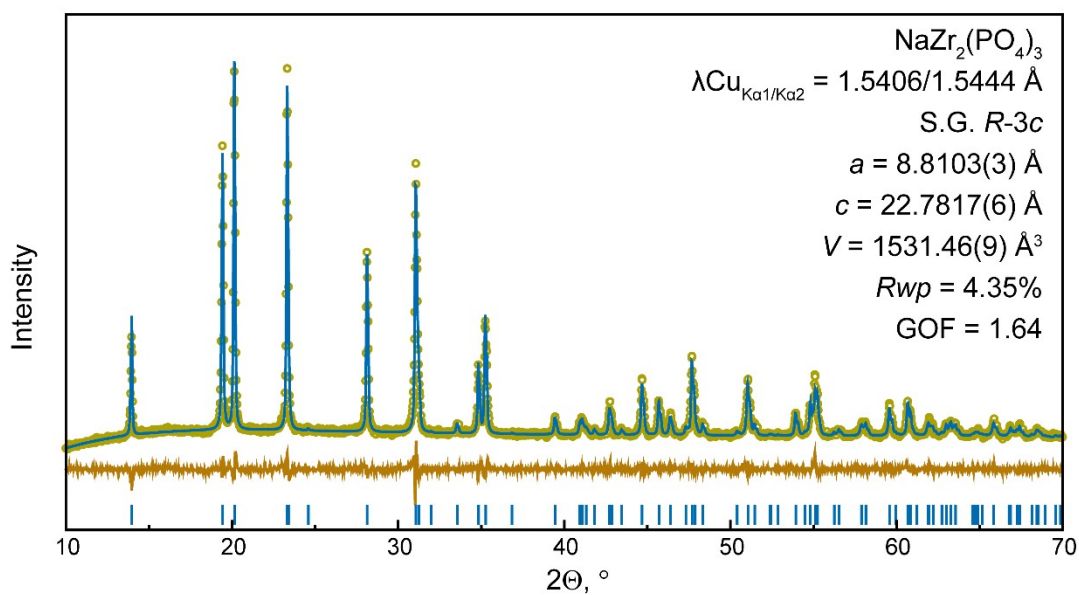

Figure 6. The Rietveld refinement of PXRD NaSICON-structured  $\text{NaZr}_2(\text{PO}_4)_3$

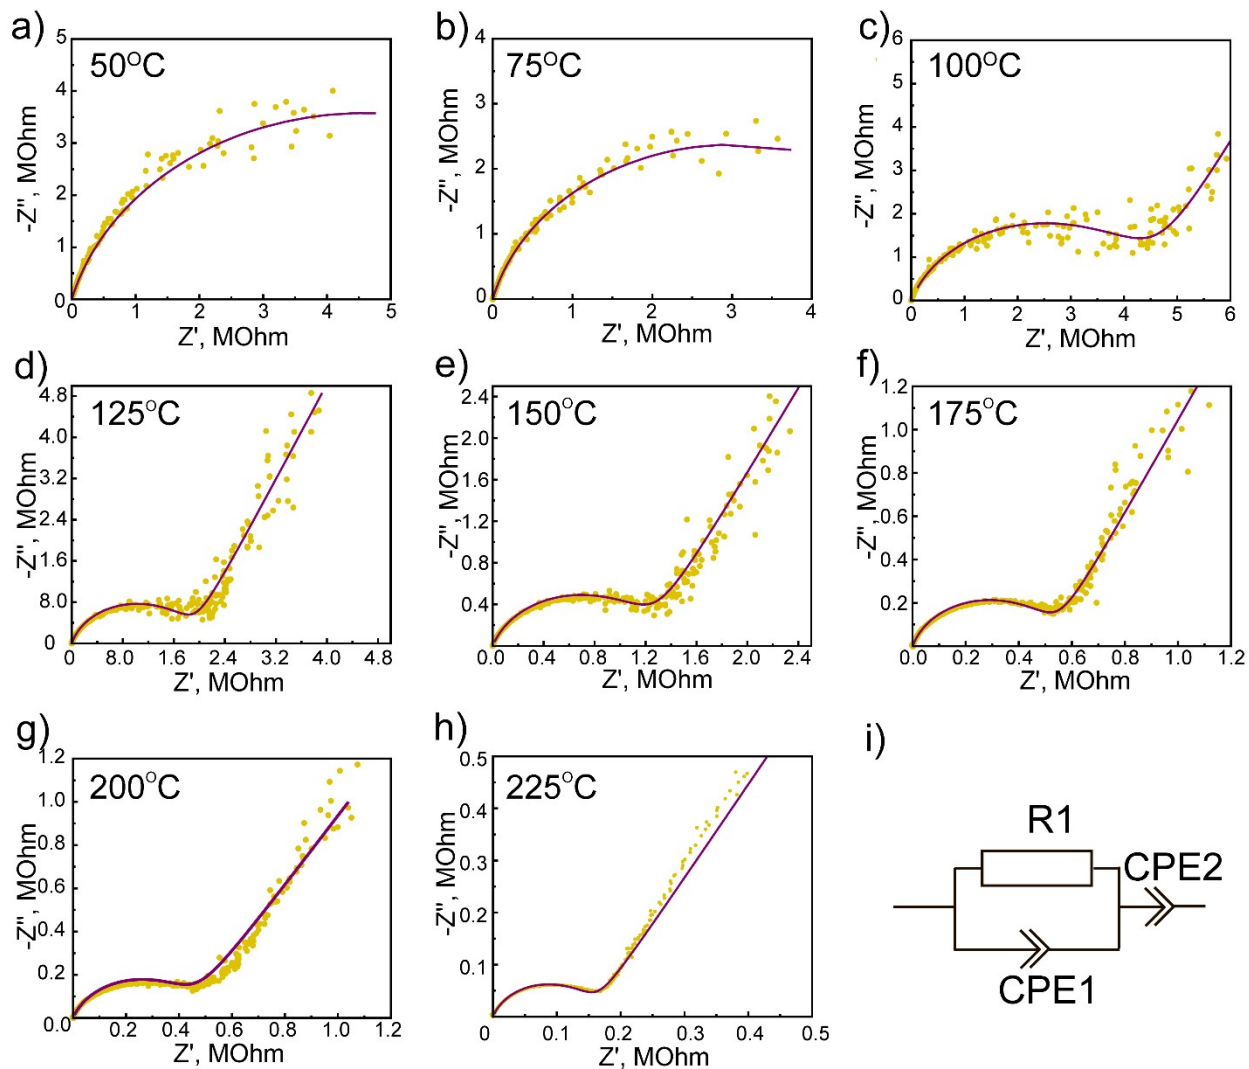

Figure 7. Nyquist plots obtained at different temperatures for  $\text{NaZr}_2(\text{PO}_4)_3$  (a – h), yellow circles – experimental data, purple line – calculated data, and equivalent circuit used for data fitting (i).

Table S1. Fitting parameters of EIS data.

| Temperature, °C | R1, Ohm            | Q1, $\text{Fs}^{(\alpha-1)}$ | $\alpha_1$ | Q2, $\text{Fs}^{(\alpha-1)}$ | $\alpha_2$ | Conductivity, S/cm    |
|-----------------|--------------------|------------------------------|------------|------------------------------|------------|-----------------------|
| 225             | 153353             | $1.43 \times 10^{-9}$        | 0.804      | $1.27 \times 10^{-7}$        | 0.677      | $1.04 \times 10^{-6}$ |
| 200             | 424974             | $1.46 \times 10^{-9}$        | 0.794      | $8.76 \times 10^{-8}$        | 0.647      | $3.75 \times 10^{-7}$ |
| 175             | 521246             | $9.90 \times 10^{-10}$       | 0.812      | $6.63 \times 10^{-8}$        | 0.724      | $3.05 \times 10^{-7}$ |
| 150             | $1.21 \times 10^6$ | $1.00 \times 10^{-10}$       | 0.802      | $4.96 \times 10^{-8}$        | 0.712      | $1.32 \times 10^{-7}$ |
| 125             | $1.84 \times 10^6$ | $7.04 \times 10^{-10}$       | 0.832      | $4.10 \times 10^{-8}$        | 0.741      | $8.65 \times 10^{-8}$ |
| 100             | $4.38 \times 10^6$ | $7.95 \times 10^{-10}$       | 0.803      | $3.33 \times 10^{-8}$        | 0.720      | $3.63 \times 10^{-8}$ |
| 75              | $6.05 \times 10^6$ | $4.60 \times 10^{-10}$       | 0.847      |                              |            | $2.63 \times 10^{-8}$ |
| 50              | $9.17 \times 10^6$ | $4.41 \times 10^{-10}$       | 0.843      |                              |            | $1.74 \times 10^{-8}$ |

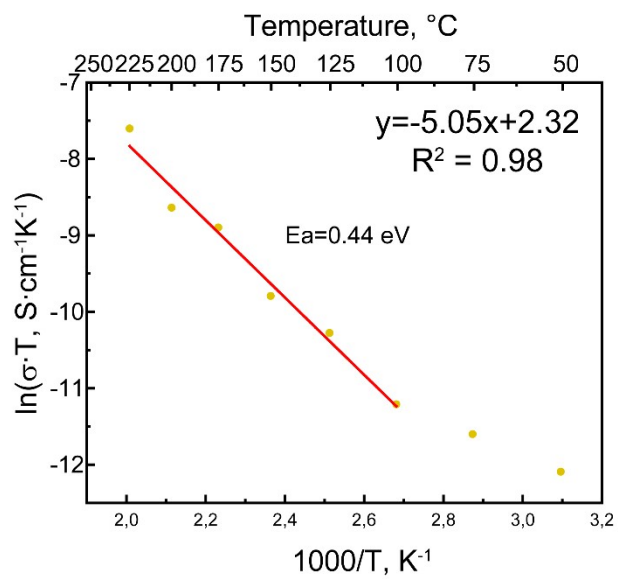

Figure 8. The Arrhenius plot of the  $\text{Na}^+$  ion conductivity of  $\text{NaZr}_2(\text{PO}_4)_3$
